# Supplementary material for: Bitter Peptides YFYPEL, VAPFPEVF, and YQEPVLGPVRGPFPIIV, Released during Gastric Digestion of Casein, Stimulate Mechanisms of Gastric Acid Secretion via Bitter Taste Receptors TAS2R16 and TAS2R38
Source: PubMed Central journal article supplement (PMC9501810; doi:10.1021/acs.jafc.2c05228), 2022-09-02
Supplement: jf2c05228_si_001.pdf [file jf2c05228_si_001.pdf]

## Supporting Information

**Bitter peptides YFYPEL, VAPFPEVF and YQEPVLGPVRGPFPIIV, released during gastric digestion of casein, stimulate mechanisms of gastric acid secretion via bitter taste receptors TAS2R16 and TAS2R38**

Phil Richter<sup>1</sup>, Karin Sebald<sup>1</sup>, Konrad Fischer<sup>2</sup>, Maik Behrens<sup>1</sup>, Angelika Schnieke<sup>2</sup>, Veronika Somoza<sup>1,3,4\*</sup>

## Tables

Table-SI 1. Changes in gene expression of the bitter receptors after incubation for 15/30/60/120 min with peptides VAPFPEVF (17.5  $\mu$ M), YFYPEL (0.03  $\mu$ M) and YQEPVLGPVRGPFPIIV (0.4  $\mu$ M). Normalized to the expression of PPIA and GAPDH and expression of the receptors in HGT-1 cells without treatment. Data shown as mean  $\pm$  SEM, n = 3 – 5, t. r. = 3, Statistics: t test Holm-Šidák method; significant differences are expressed with \* =  $p \leq 0.05$ .

| receptor       | treatment         | 15 min      |                    | 30 min      |                    | 60 min      |                    | 120 min     |                    |
|----------------|-------------------|-------------|--------------------|-------------|--------------------|-------------|--------------------|-------------|--------------------|
| <i>TAS2R1</i>  | VAPFPEVF          | 0.79        | $\pm$ 0.12         | 1.36        | $\pm$ 0.20         | 0.44        | $\pm$ 0.22         | 1.62        | $\pm$ 0.61         |
|                | YFYPEL            | 0.36        | $\pm$ 0.25         | 1.03        | $\pm$ 0.38         | 0.55        | $\pm$ 0.33         | 0.73        | $\pm$ 0.29         |
|                | YQEPVLGPVRGPFPIIV | 0.33        | $\pm$ 0.43         | 0.43        | $\pm$ 0.23         | 1.00        | $\pm$ 0.63         | 0.84        | $\pm$ 0.26         |
| <i>TAS2R3</i>  | VAPFPEVF          | <b>0.70</b> | $\pm$ <b>0.05*</b> | <b>1.56</b> | $\pm$ <b>0.22*</b> | 1.06        | $\pm$ 0.04         | <b>1.72</b> | $\pm$ <b>0.12*</b> |
|                | YFYPEL            | <b>1.54</b> | $\pm$ <b>0.07*</b> | 1.08        | $\pm$ 0.16         | 1.19        | $\pm$ 0.12         | <b>1.34</b> | $\pm$ <b>0.08*</b> |
|                | YQEPVLGPVRGPFPIIV | 1.03        | $\pm$ 0.11         | <b>1.89</b> | $\pm$ <b>0.19*</b> | <b>1.61</b> | $\pm$ <b>0.22*</b> | <b>1.40</b> | $\pm$ <b>0.02*</b> |
| <i>TAS2R4</i>  | VAPFPEVF          | <b>0.50</b> | $\pm$ <b>0.06*</b> | 1.14        | $\pm$ 0.19         | 0.95        | $\pm$ 0.07         | <b>1.42</b> | $\pm$ <b>0.14*</b> |
|                | YFYPEL            | <b>1.24</b> | $\pm$ <b>0.07*</b> | 0.81        | $\pm$ 0.12         | 0.92        | $\pm$ 0.07         | 1.13        | $\pm$ 0.11         |
|                | YQEPVLGPVRGPFPIIV | 0.79        | $\pm$ 0.08         | <b>1.71</b> | $\pm$ <b>0.19*</b> | <b>1.60</b> | $\pm$ <b>0.22*</b> | <b>1.21</b> | $\pm$ <b>0.03*</b> |
| <i>TAS2R5</i>  | VAPFPEVF          | 0.91        | $\pm$ 0.04         | 1.05        | $\pm$ 0.07         | 0.93        | $\pm$ 0.06         | 1.23        | $\pm$ 0.10         |
|                | YFYPEL            | <b>1.34</b> | $\pm$ <b>0.03*</b> | 1.03        | $\pm$ 0.10         | 0.90        | $\pm$ 0.04         | 1.02        | $\pm$ 0.04         |
|                | YQEPVLGPVRGPFPIIV | 1.25        | $\pm$ 0.10         | <b>1.45</b> | $\pm$ <b>0.10*</b> | <b>1.39</b> | $\pm$ <b>0.13*</b> | <b>1.22</b> | $\pm$ <b>0.03*</b> |
| <i>TAS2R7</i>  | VAPFPEVF          | 1.20        | $\pm$ 0.32         | 0.71        | $\pm$ 0.34         | <b>1.05</b> | $\pm$ <b>1.05</b>  | 0.62        | $\pm$ 0.21         |
|                | YFYPEL            | 1.23        | $\pm$ 0.83         | 2.50        | $\pm$ 1.32         | <b>6.71</b> | $\pm$ <b>1.56*</b> | 1.18        | $\pm$ 0.41         |
|                | YQEPVLGPVRGPFPIIV | 0.49        | $\pm$ 0.24         | 0.74        | $\pm$ 0.35         | 0.70        | $\pm$ 0.94         | 1.82        | $\pm$ 1.25         |
| <i>TAS2R8</i>  | VAPFPEVF          | 1.24        | $\pm$ 0.13         | <b>2.25</b> | $\pm$ <b>0.32*</b> | 1.34        | $\pm$ 0.16         | <b>2.04</b> | $\pm$ <b>0.23*</b> |
|                | YFYPEL            | <b>1.62</b> | $\pm$ <b>0.22*</b> | <b>1.90</b> | $\pm$ <b>0.31*</b> | <b>1.87</b> | $\pm$ <b>0.39*</b> | <b>1.69</b> | $\pm$ <b>0.21*</b> |
|                | YQEPVLGPVRGPFPIIV | 1.39        | $\pm$ 0.23         | <b>2.45</b> | $\pm$ <b>0.28*</b> | <b>1.87</b> | $\pm$ <b>0.32*</b> | <b>1.93</b> | $\pm$ <b>0.23*</b> |
| <i>TAS2R9</i>  | VAPFPEVF          | 1.73        | $\pm$ 0.08         | 1.08        | $\pm$ 0.47         | 2.31        | $\pm$ 0.75         | 0.99        | $\pm$ 0.69         |
|                | YFYPEL            | 0.66        | $\pm$ 0.42         | 2.64        | $\pm$ 0.57         | 3.01        | $\pm$ 0.75         | 1.41        | $\pm$ 0.22         |
|                | YQEPVLGPVRGPFPIIV | 0.43        | $\pm$ 0.68         | 0.44        | $\pm$ 0.80         | 1.91        | $\pm$ 1.12         | 0.73        | $\pm$ 0.32         |
| <i>TAS2R10</i> | VAPFPEVF          | <b>0.34</b> | $\pm$ <b>0.05*</b> | 0.76        | $\pm$ 0.14         | 0.91        | $\pm$ 0.15         | 1.15        | $\pm$ 0.10         |
|                | YFYPEL            | <b>0.64</b> | $\pm$ <b>0.08*</b> | <b>0.41</b> | $\pm$ <b>0.05*</b> | 0.72        | $\pm$ 0.20         | 0.90        | $\pm$ 0.11         |
|                | YQEPVLGPVRGPFPIIV | <b>0.52</b> | $\pm$ <b>0.06*</b> | 0.78        | $\pm$ 0.07         | 0.90        | $\pm$ 0.12         | 1.04        | $\pm$ 0.08         |
| <i>TAS2R13</i> | VAPFPEVF          | <b>0.44</b> | $\pm$ <b>0.09*</b> | 1.28        | $\pm$ 0.33         | 1.01        | $\pm$ 0.05         | <b>1.92</b> | $\pm$ <b>0.36*</b> |
|                | YFYPEL            | 1.14        | $\pm$ 0.07         | <b>0.53</b> | $\pm$ <b>0.11*</b> | 0.78        | $\pm$ 0.06         | 0.88        | $\pm$ 0.36         |
|                | YQEPVLGPVRGPFPIIV | 0.70        | $\pm$ 0.11         | <b>1.65</b> | $\pm$ <b>0.32*</b> | 1.16        | $\pm$ 0.15         | 1.31        | $\pm$ 0.08         |
| <i>TAS2R14</i> | VAPFPEVF          | <b>0.67</b> | $\pm$ <b>0.02*</b> | 0.97        | $\pm$ 0.05         | <b>0.86</b> | $\pm$ <b>0.03*</b> | 1.08        | $\pm$ 0.03         |
|                | YFYPEL            | <b>1.11</b> | $\pm$ <b>0.01*</b> | 0.92        | $\pm$ 0.05         | 0.99        | $\pm$ 0.02         | <b>1.21</b> | $\pm$ <b>0.09*</b> |
|                | YQEPVLGPVRGPFPIIV | <b>0.85</b> | $\pm$ <b>0.04*</b> | 1.08        | $\pm$ 0.06         | 1.03        | $\pm$ 0.04         | <b>1.08</b> | $\pm$ <b>0.02*</b> |
| <i>TAS2R16</i> | VAPFPEVF          | <b>1.50</b> | $\pm$ <b>0.08*</b> | <b>3.70</b> | $\pm$ <b>0.97*</b> | <b>1.65</b> | $\pm$ <b>0.24*</b> | <b>2.88</b> | $\pm$ <b>0.28*</b> |
|                | YFYPEL            | <b>2.58</b> | $\pm$ <b>0.43*</b> | <b>3.19</b> | $\pm$ <b>0.50*</b> | <b>2.44</b> | $\pm$ <b>0.58*</b> | <b>2.51</b> | $\pm$ <b>0.83*</b> |
|                | YQEPVLGPVRGPFPIIV | <b>2.61</b> | $\pm$ <b>0.58*</b> | <b>3.46</b> | $\pm$ <b>0.58*</b> | <b>2.50</b> | $\pm$ <b>0.41*</b> | <b>3.00</b> | $\pm$ <b>0.31*</b> |
| <i>TAS2R19</i> | VAPFPEVF          | <b>0.66</b> | $\pm$ <b>0.07*</b> | 1.22        | $\pm$ 0.17         | <b>0.69</b> | $\pm$ <b>0.02*</b> | <b>1.25</b> | $\pm$ <b>0.09*</b> |
|                | YFYPEL            | <b>1.60</b> | $\pm$ <b>0.02*</b> | 0.82        | $\pm$ 0.09         | 0.79        | $\pm$ 0.07         | 1.05        | $\pm$ 0.14         |
|                | YQEPVLGPVRGPFPIIV | 0.85        | $\pm$ 0.14         | <b>1.58</b> | $\pm$ <b>0.09*</b> | 1.27        | $\pm$ 0.17         | 1.05        | $\pm$ 0.03         |
| <i>TAS2R20</i> | VAPFPEVF          | <b>0.70</b> | $\pm$ <b>0.07*</b> | <b>1.33</b> | $\pm$ <b>0.13*</b> | <b>0.87</b> | $\pm$ <b>0.03*</b> | <b>1.78</b> | $\pm$ <b>0.20*</b> |
|                | YFYPEL            | <b>1.37</b> | $\pm$ <b>0.05*</b> | 0.93        | $\pm$ 0.07         | 0.94        | $\pm$ 0.09         | 1.16        | $\pm$ 0.13         |
|                | YQEPVLGPVRGPFPIIV | 0.95        | $\pm$ 0.08         | <b>1.42</b> | $\pm$ <b>0.06*</b> | <b>1.38</b> | $\pm$ <b>0.08*</b> | <b>1.31</b> | $\pm$ <b>0.06*</b> |
| <i>TAS2R30</i> | VAPFPEVF          | <b>0.56</b> | $\pm$ <b>0.09*</b> | <b>1.53</b> | $\pm$ <b>0.32*</b> | <b>0.75</b> | $\pm$ <b>0.04*</b> | <b>1.62</b> | $\pm$ <b>0.19*</b> |
|                | YFYPEL            | <b>1.79</b> | $\pm$ <b>0.06*</b> | <b>0.62</b> | $\pm$ <b>0.09*</b> | 0.89        | $\pm$ 0.08         | 1.15        | $\pm$ 0.31         |
|                | YQEPVLGPVRGPFPIIV | 0.74        | $\pm$ 0.13         | <b>1.88</b> | $\pm$ <b>0.20*</b> | 1.20        | $\pm$ 0.17         | 0.89        | $\pm$ 0.03         |
| <i>TAS2R31</i> | VAPFPEVF          | <b>0.66</b> | $\pm$ <b>0.05*</b> | 1.14        | $\pm$ 0.14         | <b>0.70</b> | $\pm$ <b>0.04*</b> | <b>1.22</b> | $\pm$ <b>0.07*</b> |
|                | YFYPEL            | <b>1.65</b> | $\pm$ <b>0.05*</b> | 0.91        | $\pm$ 0.06         | 0.96        | $\pm$ 0.05         | 1.09        | $\pm$ 0.11         |
|                | YQEPVLGPVRGPFPIIV | 0.86        | $\pm$ 0.12         | <b>1.43</b> | $\pm$ <b>0.11*</b> | <b>1.33</b> | $\pm$ <b>0.12*</b> | 0.99        | $\pm$ 0.04         |

| receptor       | treatment          | 15 min      |                | 30 min      |                | 60 min       |                | 120 min     |                |
|----------------|--------------------|-------------|----------------|-------------|----------------|--------------|----------------|-------------|----------------|
| <i>TAS2R38</i> | VAPFPEVF           | 1.31        | ± 0.26         | <b>2.42</b> | ± <b>0.55*</b> | 1.15         | ± 0.23         | <b>2.45</b> | ± <b>0.26*</b> |
|                | YFYPEL             | <b>2.96</b> | ± <b>0.64*</b> | <b>3.40</b> | ± <b>0.80*</b> | <b>2.39</b>  | ± <b>0.62*</b> | <b>2.91</b> | ± <b>0.67*</b> |
|                | YQEPVLGPVVRGPFPIIV | <b>2.01</b> | ± <b>0.41*</b> | <b>3.71</b> | ± <b>0.93*</b> | <b>2.05</b>  | ± <b>0.49*</b> | <b>2.38</b> | ± <b>0.34*</b> |
| <i>TAS2R39</i> | VAPFPEVF           | <b>0.39</b> | ± <b>0.13*</b> | 1.37        | ± 0.34         | <b>0.55</b>  | ± <b>0.06*</b> | 1.16        | ± 0.25         |
|                | YFYPEL             | 1.21        | ± 0.16         | <b>0.42</b> | ± <b>0.09*</b> | <b>0.62</b>  | ± <b>0.12*</b> | 0.45        | ± 0.31         |
|                | YQEPVLGPVVRGPFPIIV | <b>0.53</b> | ± <b>0.12*</b> | 1.16        | ± 0.14         | 0.73         | ± 0.13         | <b>0.53</b> | ± <b>0.09*</b> |
| <i>TAS2R40</i> | VAPFPEVF           | 0.81        | ± 0.15         | 1.54        | ± 0.37         | 0.88         | ± 0.06         | 1.42        | ± 0.28         |
|                | YFYPEL             | <b>1.90</b> | ± <b>0.12*</b> | 0.82        | ± 0.12         | <b>0.59</b>  | ± <b>0.06*</b> | 0.75        | ± 0.14         |
|                | YQEPVLGPVVRGPFPIIV | 0.92        | ± 0.14         | <b>1.78</b> | ± <b>0.29*</b> | 0.96         | ± 0.26         | 0.86        | ± 0.07         |
| <i>TAS2R41</i> | VAPFPEVF           | 0.95        | ± 0.27         | 2.32        | ± 1.06         | 0.98         | ± 0.20         | 1.90        | ± 0.68         |
|                | YFYPEL             | <b>2.82</b> | ± <b>0.64*</b> | 1.56        | ± 0.32         | <b>4.58</b>  | ± <b>2.91*</b> | 3.00        | ± 2.14         |
|                | YQEPVLGPVVRGPFPIIV | 1.31        | ± 0.67         | 1.71        | ± 2.35         | 2.95         | ± 1.80         | <b>4.61</b> | ± <b>2.03*</b> |
| <i>TAS2R42</i> | VAPFPEVF           | <b>0.52</b> | ± <b>0.09*</b> | 0.88        | ± 0.10         | <b>0.71</b>  | ± <b>0.03*</b> | 1.20        | ± 0.14         |
|                | YFYPEL             | 1.17        | ± 0.09         | <b>0.55</b> | ± <b>0.12*</b> | <b>0.69</b>  | ± <b>0.11*</b> | 0.93        | ± 0.09         |
|                | YQEPVLGPVVRGPFPIIV | 0.62        | ± 0.19         | <b>1.38</b> | ± <b>0.15*</b> | 1.18         | ± 0.13         | 0.94        | ± 0.06         |
| <i>TAS2R43</i> | VAPFPEVF           | <b>0.57</b> | ± <b>0.07*</b> | 1.14        | ± 0.25         | <b>0.72</b>  | ± <b>0.03*</b> | <b>1.49</b> | ± <b>0.15*</b> |
|                | YFYPEL             | <b>1.49</b> | ± <b>0.04*</b> | <b>0.64</b> | ± <b>0.06*</b> | 0.91         | ± 0.04         | 1.02        | ± 0.21         |
|                | YQEPVLGPVVRGPFPIIV | <b>0.69</b> | ± <b>0.09*</b> | <b>1.44</b> | ± <b>0.12*</b> | 1.15         | ± 0.14         | 0.88        | ± 0.04         |
| <i>TAS2R45</i> | VAPFPEVF           | <b>0.52</b> | ± <b>0.05*</b> | 1.08        | ± 0.17         | <b>0.68</b>  | ± <b>0.03*</b> | 1.17        | ± 0.11         |
|                | YFYPEL             | <b>1.15</b> | ± <b>0.05*</b> | <b>0.54</b> | ± <b>0.06*</b> | <b>0.70</b>  | ± <b>0.03*</b> | 0.94        | ± 0.21         |
|                | YQEPVLGPVVRGPFPIIV | <b>0.63</b> | ± <b>0.09*</b> | <b>1.25</b> | ± <b>0.12*</b> | 1.06         | ± 0.12         | <b>0.84</b> | ± <b>0.04*</b> |
| <i>TAS2R46</i> | VAPFPEVF           | <b>0.62</b> | ± <b>0.07*</b> | <b>1.47</b> | ± <b>0.29*</b> | 0.85         | ± 0.05         | <b>1.95</b> | ± <b>0.21*</b> |
|                | YFYPEL             | <b>1.70</b> | ± <b>0.08*</b> | 0.73        | ± 0.12         | 1.01         | ± 0.11         | 1.30        | ± 0.30         |
|                | YQEPVLGPVVRGPFPIIV | 0.69        | ± 0.13         | <b>1.73</b> | ± <b>0.18*</b> | 1.30         | ± 0.17         | 1.06        | ± 0.04         |
| <i>TAS2R50</i> | VAPFPEVF           | <b>0.56</b> | ± <b>0.06*</b> | 1.39        | ± 0.35         | 0.83         | ± 0.05         | <b>1.56</b> | ± <b>0.18*</b> |
|                | YFYPEL             | <b>1.50</b> | ± <b>0.06*</b> | 0.70        | ± 0.11         | 0.92         | ± 0.09         | 0.91        | ± 0.25         |
|                | YQEPVLGPVVRGPFPIIV | <b>0.67</b> | ± <b>0.08*</b> | <b>1.66</b> | ± <b>0.19*</b> | 1.21         | ± 0.13         | 1.07        | ± 0.08         |
| <i>TAS2R60</i> | VAPFPEVF           |             |                |             |                | not detected |                |             |                |
|                | YFYPEL             |             |                |             |                | not detected |                |             |                |
|                | YQEPVLGPVVRGPFPIIV |             |                |             |                | not detected |                |             |                |

Table-SI 2. Optimized parameters declustering potential (DP), collision energy (CE), and collision cell exit potential (CXP) for each peptide and transition.

| peptide sequence  | Q1 mass (Da) | DP (volts) | Q3 mass (Da) | CE (volts) | CXP (volts) |
|-------------------|--------------|------------|--------------|------------|-------------|
| YFYPEL            | 416.356      | 36         | 700.2        | 9          | 28          |
|                   |              |            | 571.2        | 13         | 24          |
|                   |              |            | 474.1        | 13         | 28          |
|                   |              |            | 358.1        | 11         | 22          |
|                   |              |            | 350.7        | 11         | 12          |
| PVVVPFLQPEVM      | 726.897      | 180        | 1058.5       | 15         | 26          |
|                   |              |            | 978.5        | 23         | 28          |
|                   |              |            | 977.5        | 21         | 26          |
|                   |              |            | 652.2        | 17         | 20          |
|                   |              |            | 475.2        | 21         | 30          |
| YYVPLGTQ          | 470.592      | 21         | 794.3        | 11         | 32          |
|                   |              |            | 636.4        | 11         | 18          |
|                   |              |            | 614.2        | 15         | 20          |
|                   |              |            | 596.3        | 19         | 38          |
|                   |              |            | 515.2        | 13         | 16          |
| VAPFPEVF          | 453.135      | 20         | 740.4        | 11         | 20          |
|                   |              |            | 735.3        | 11         | 16          |
|                   |              |            | 641.2        | 13         | 14          |
|                   |              |            | 570.2        | 15         | 30          |
|                   |              |            | 491.3        | 11         | 18          |
| YQEPVLGPVRGFPFIIV | 940.920      | 80         | 1151.6       | 45         | 54          |
|                   |              |            | 1094.5       | 45         | 54          |
|                   |              |            | 882.4        | 33         | 24          |
|                   |              |            | 730.6        | 39         | 38          |
|                   |              |            | 441.3        | 41         | 24          |

Table-SI 3. Sequences of the primer pairs used for RT-qPCR.<sup>13,37,38</sup>

| <b>Gene</b> | <b>Direction</b> | <b>Sequence (5' to 3')</b> | <b>Amplicon length, bp</b> |
|-------------|------------------|----------------------------|----------------------------|
| TAS2R1      | Forward          | AAATGGCTCCGCTGGATCTC       | 172                        |
|             | Reverse          | GTGGCAAGCCAAAGTTCCAA       |                            |
| TAS2R3      | Forward          | GGGACTCACCGAGGGGGTGT       | 160                        |
|             | Reverse          | CCTCAAGAGTGCCAGGGTGGTG     |                            |
| TAS2R4      | Forward          | GCAGTGTCTGGTTTGTGACC       | 168                        |
|             | Reverse          | GCGTGATGTACAGGCAAGTG       |                            |
| TAS2R5      | Forward          | ACACTCATGGCAGCCTATCC       | 107                        |
|             | Reverse          | CGAGCACACACTGTCTTCCA       |                            |
| TAS2R7      | Forward          | GCAGGTGTGGATGTCAAATC       | 167                        |
|             | Reverse          | TCTTGACCCAGTCCATGCAG       |                            |
| TAS2R8      | Forward          | ATGTGGATTACCACCTGCCT       | 135                        |
|             | Reverse          | GGAAATGGCAAAGCATCCCAG      |                            |
| TAS2R9      | Forward          | GCAGATTCGACTGCATGCTAC      | 70                         |
|             | Reverse          | TGCCTTTATGGCCCTCATGT       |                            |
| TAS2R10     | Forward          | GCTACGTGTAGTGAAGGCA        | 73                         |
|             | Reverse          | TCCATTCCCCAAAACCCCAA       |                            |
| TAS2R13     | Forward          | GAAAGTGCCCTGCCGAGTAT       | 177                        |
|             | Reverse          | CCAGATCAGCCCAATTCTGGA      |                            |
| TAS2R14     | Forward          | CCAGGTGATGGGAATGGCTTA      | 128                        |
|             | Reverse          | AGGGCTCCCCATCTTTGAAC       |                            |
| TAS2R16     | Forward          | ATGGCATCACTGACCAAGCA       | 255                        |
|             | Reverse          | TTTCAACGTAGGGCTGCTCA       |                            |
| TAS2R19     | Forward          | TCTTAGGACACAGCAGAGCA       | 146                        |
|             | Reverse          | AGCGTGCATCTGCCACAAAA       |                            |
| TAS2R20     | Forward          | ATTTGGGGGAACAAGACGCT       | 183                        |
|             | Reverse          | ACTACGGAAAAAATTGTGGGAA     |                            |
| TAS2R30     | Forward          | GGCTGAAAAGCAACCTGTC        | 191                        |
|             | Reverse          | ACACAATGCCCCTCTTGTGA       |                            |
| TAS2R31     | Forward          | TTGAGGAGTGCAGTGTACCTTC     | 218                        |
|             | Reverse          | ACGGCACATAACAAGAGGAAAA     |                            |
| TAS2R38     | Forward          | CCCAGCCTGGAGGCCACATT       | 216                        |
|             | Reverse          | TCACAGCTCTCCTCAACTGGCA     |                            |
| TAS2R39     | Forward          | TTCTGTGGCTGTCCGTGTTA       | 207                        |
|             | Reverse          | GGGTGGCTGTCAGGATGAAC       |                            |
| TAS2R40     | Forward          | CGGTGAACACAGATGCCACAGATA   | 150                        |
|             | Reverse          | GTGTTTTGCCCTGGCCCACT       |                            |
| TAS2R41     | Forward          | GCAGCGAATGGCTTCATTGT       | 223                        |
|             | Reverse          | TGGCTGAGTTCAGGAAGTGC       |                            |
| TAS2R42     | Forward          | TCCTCACCTGCTTGGCTATC       | 161                        |
|             | Reverse          | GGCAAGCCAGGTTGTCAAGT       |                            |
| TAS2R43     | Forward          | ATATCTGGGCAGTGATCAACC      | 148                        |
|             | Reverse          | CCCAACAACATCACCAGAATGAC    |                            |
| TAS2R45     | Forward          | AGTACCCTTTACTGTAACCC       | 170                        |
|             | Reverse          | AGTAAATGGCACGTAACAAG       |                            |

| <b>Gene</b> | <b>Direction</b> | <b>Sequence (5' to 3')</b> | <b>Amplicon length, bp</b> |
|-------------|------------------|----------------------------|----------------------------|
| TAS2R46     | Forward          | ACATGACTTGGAAGATCAAAGTGGAG | 200                        |
|             | Reverse          | AGCTTTTATGTGGACCTTCATGC    |                            |
| TAS2R50     | Forward          | CGCAAGATCTCAGCACCAAGGTC    | 151                        |
|             | Reverse          | GCCTTGCTAACCATGACAACCGGG   |                            |
| TAS2R60     | Forward          | GGTGTTTCAGTGCTGCAGGTA      | 156                        |
|             | Reverse          | CACCTTGAGGAACGACGACT       |                            |
| GAPDH       | Forward          | AGGTCGGAGTCAACGGATTTG      | 94                         |
|             | Reverse          | GGGGTCATTGATGGCAACAATA     |                            |
| PPIA        | Forward          | CCACCAGATCATTCTCTGTAGC     | 144                        |
|             | Reverse          | CTGCAATCCAGCTAGGCATGG      |                            |

## Figures

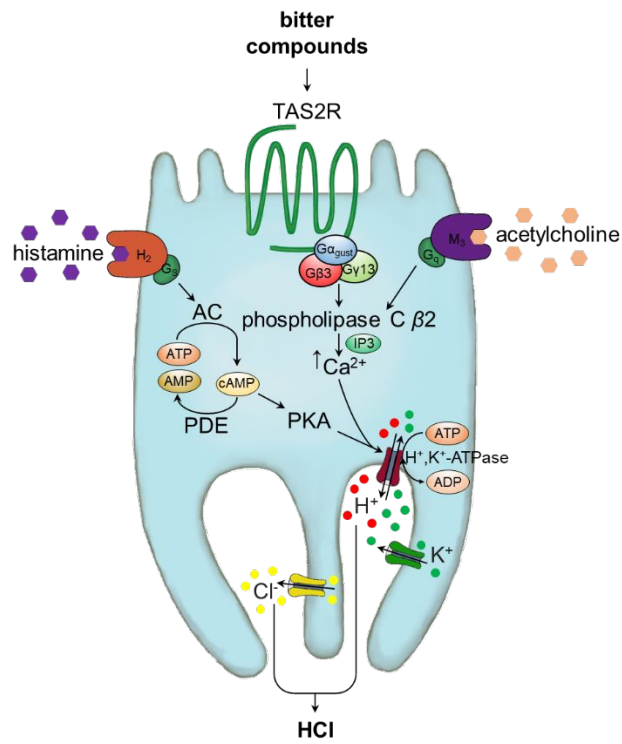

Figure-SI 1. Illustration of the proposed mechanism of proton secretion induced by bitter compounds in HGT-1 cells.<sup>5,56</sup>

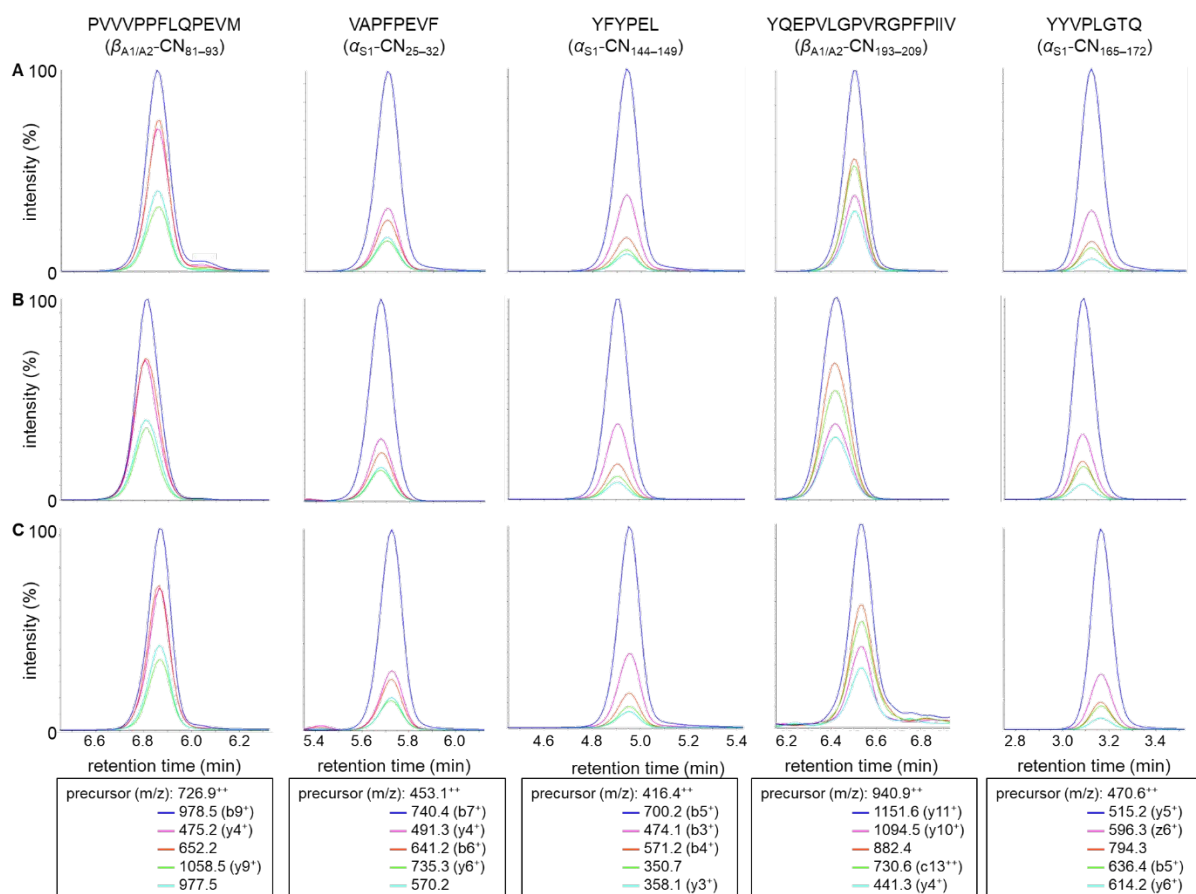

Figure-SI 2. Comparison of retention times (UPLC) and SRM mass transitions (MS/MS; 5 transitions per peptide; transitions identified with skyline 21.1.0.146) of PVVVPFLQPEVM, VAPFPEVF, YFYPEL, YQEPVLGPVRGPFPIIV and YYVPLGTQ as (A) synthesized standard, (B) formed in *in vitro* digestion, and (C) formed in *in vivo* digestion.



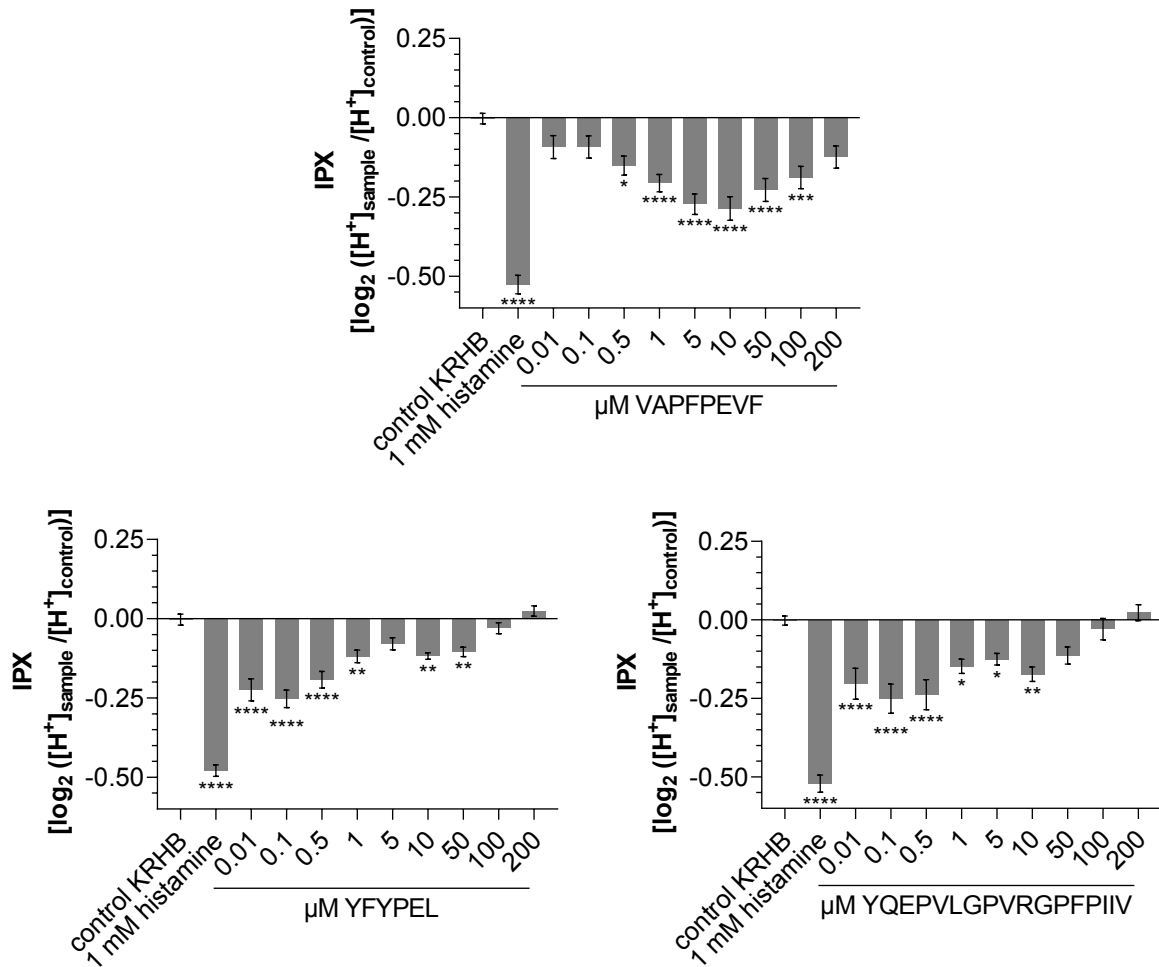

Figure-SI 3. Effect on proton secretion of HGT-1 cells incubated with VAPFPEVF (top) and the peptides YFYPEL and YQEPVLGPVIRGPFPIIV with similar IPX profile (bottom). Data shown as mean  $\pm$  SEM after incubation for 10 minutes,  $n = 4 - 8$ , t. r. = 4 - 6, control: KRHB, Statistics: one-way ANOVA Holm-Šidák post hoc test; significant differences are expressed with \* =  $p \leq 0.05$ , \*\* =  $p \leq 0.01$ , \*\*\* =  $p \leq 0.001$ , \*\*\*\* =  $p \leq 0.0001$ .

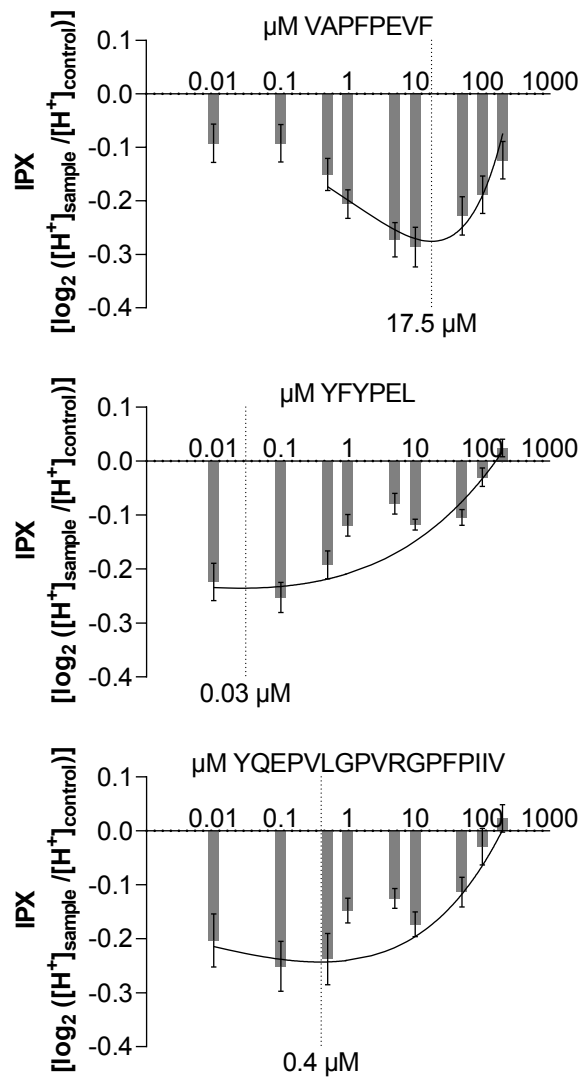

Figure-SI 4. Curve fit calculations of the proton secretion profile of the three peptides to determine which concentration has the greatest effect on proton secretion activity in HGT-1 cells in each case.

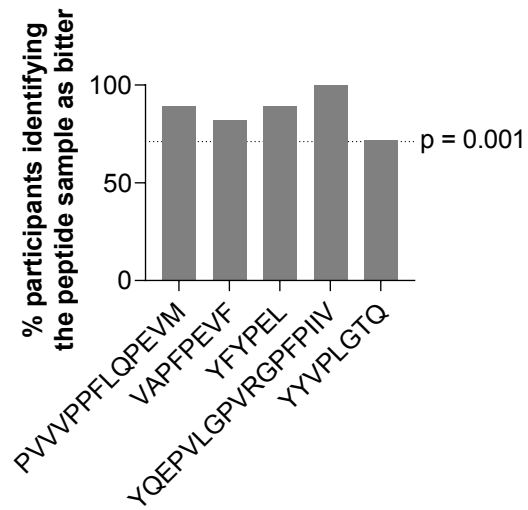

Figure-SI 5. Sensory experiments revealed significant bitterness ( $p \leq 0.001$ ) toward water for all five selected peptides.

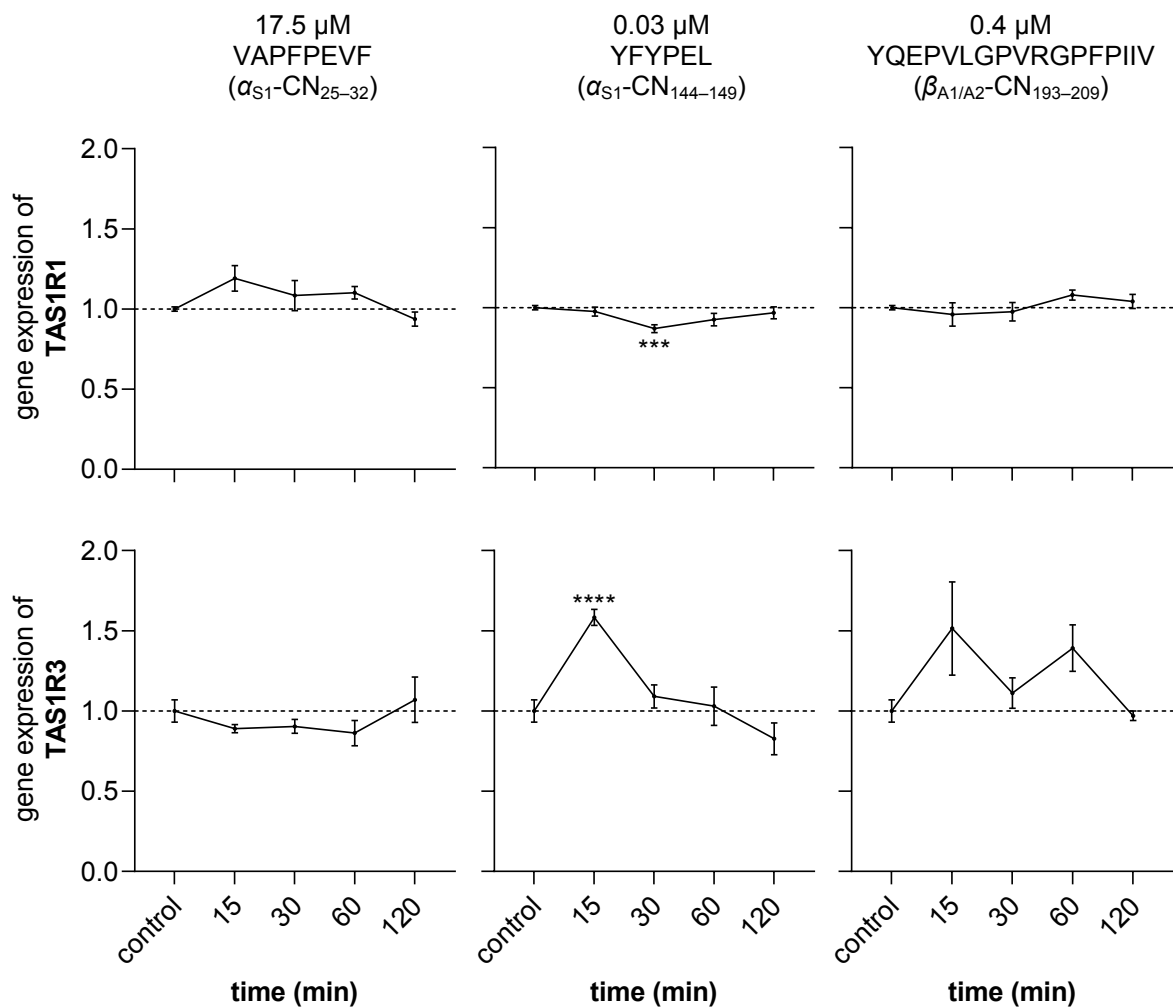

Figure-SI 6. Changes in gene expression (fold change) of taste receptors TAS1R1 (top) and TAS1R3 (bottom) as a function of incubation time with peptides VAPFPEVF (17.5 μM; left), YFYPEL (0.03 μM; center) and YQEPVLGPVRGPFPIIV (0.4 μM; right). Normalized to the expression of PPIA and GAPDH (reference genes). Data shown as mean ± SEM, n = 3, t. r. = 3, Statistics: t test Holm-Šidák method; significant differences are expressed with \*\*\* = p ≤ 0.001, \*\*\*\* = p ≤ 0.0001.

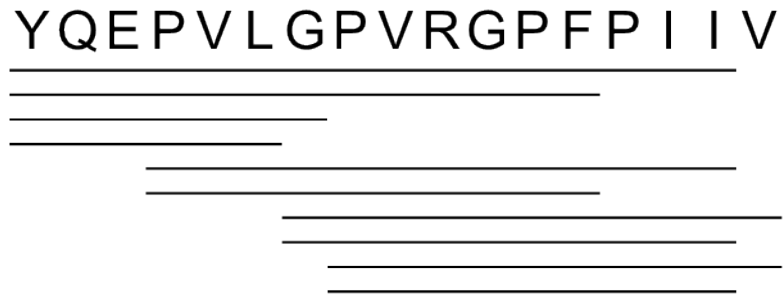

Figure-SI 7. Identified degradation products of YQEPVLGPVRGPFPIIV ( $\beta_{A1/A2}$ -CN<sub>193-209</sub>) found in the further course of digestion explaining the degradation of the peptide.

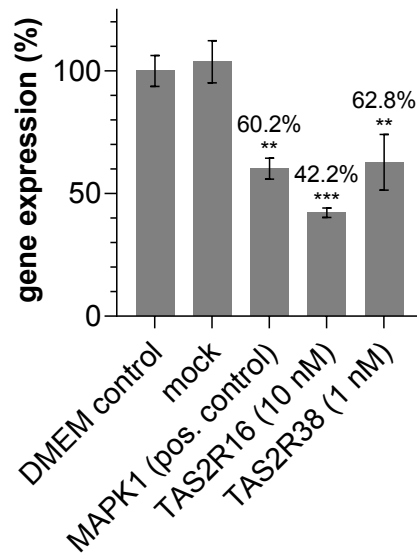

Figure-SI 8. Gene expression was reduced by transient transfection (knock-down) after 72 h. Mock transfections were performed with siRNA without target. Reduction in expression was best achieved with 10 nM siRNA targeting TAS2R16 (HSS121396) and 1 nM siRNA targeting TAS2R38 (HSS108754) to 42.2 and 62.8%, respectively.

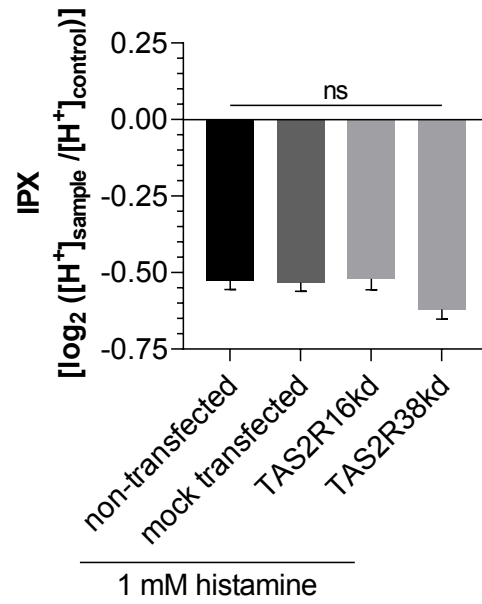

Figure-SI 9. TAS2R-independent histamine-induced stimulation of proton secretion does not differ from non-transfected cells in either mock-transfected or TAS2R16 or TAS2R38 knockdown HGT-1 cells.
